# Supplementary material
Source: PubMed Central journal article supplement (PMC10901526)

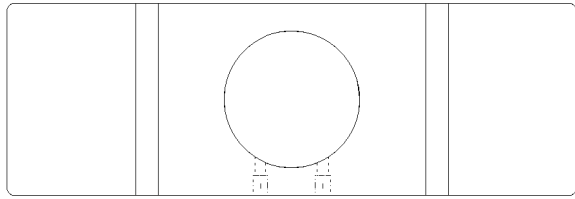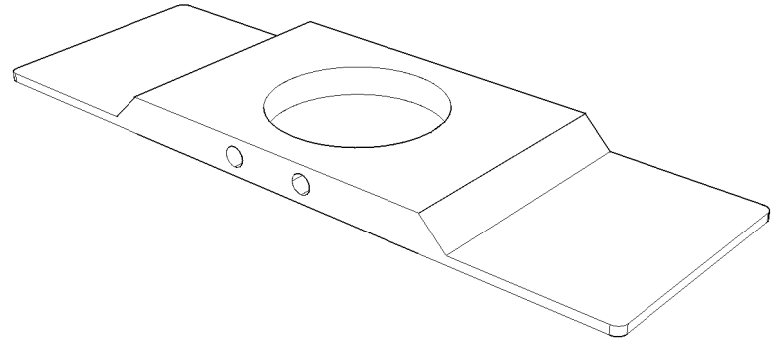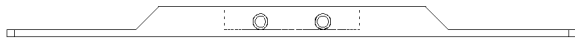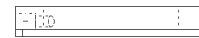

Supplement: NIHMS1858001-supplement-Supplementary_Figures_1-4.pdf [file NIHMS1858001-supplement-Supplementary_Figures_1-4.pdf]
